# Supplementary material for: Vanillin formation from ferulic acid in Vanilla planifolia is catalysed by a single enzyme
Source: PubMed Central journal article supplement (PMC4083428; doi:10.1038/ncomms5037), 2014-06-19
Supplement: ncomms5037-s1.pdf [file ncomms5037-s1.pdf]

**Supplementary Figure 1: Unlabeled standards analysed with TLC**

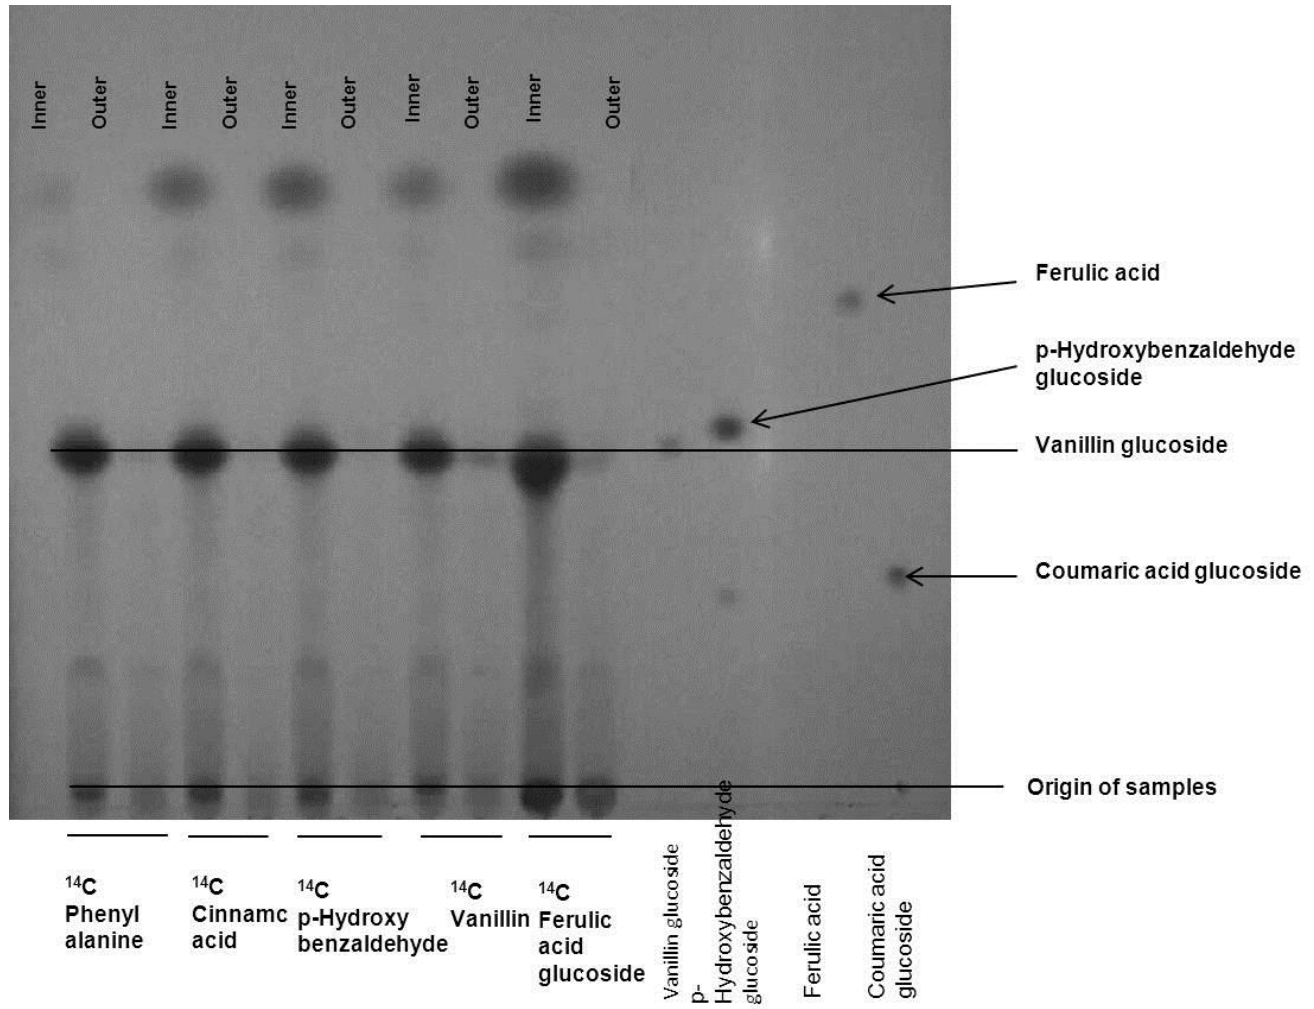

Radiolabelled precursor administered pod disc extracts compared under UV light wavelength 254nm, endogenous aromatic compounds in the vanilla pod are visualized

Unlabeled standard visualized under UV light wavelength 254nm

**Standards for TLC analysis are visualized under UV light at wavelength 254nm**

All fresh vanilla pod discs samples administrated with <sup>14</sup>C precursors were spotted on a TLC plate with non-<sup>14</sup>C labeled standards. The ascending patterns were compared under UV light wavelength 254nm. Radioactively labeled compounds are too dilute to be visualized by UV, yet it is possible to visualize the metabolite profile of aromatic compounds in the inner and outer parts of the vanilla pod.

Supplementary figure 1 shows that there is a large quantity of endogenous vanillin glucoside present in all vanilla pod samples and as expected, the inner part of the pod contains a significantly larger amount of vanillin glucoside than the outer part. The figure (to the right) shows that *p*-hydroxybenzaldehyde glucoside migrates above vanillin glucoside on the TLC with the solvent system used.

**Supplementary Figure 2:**

*a) VpVAN* gene sequence

ATG GCA GCT AAG CTC CTC TTC TTC CTA CTC TTC CTG GTC TCC GCC CTC TCC GTC  
GCG CTC GCC GGT TTC GAA GAA GAC AAT CCA ATC CGG TCC GTT ACA CAA AGG CCT  
GAC TCG ATT GAG CCT GCC ATC CTC GGC GTC CTT GGC AGT TGC CGC CAC GCC TTC  
CAC TTC GCA CGG TTC GCC CGC AGG TAC GGG AAG AGC TAC GGA TCG GAG GAG  
GAG ATC AAG AAG AGG TTC GGG ATC TTC GTG GAG AAT CTA GCG TTT ATC CGG TCC  
ACT AAT CGG AAG GAT CTG TCG TAT ACC CTA GGA ATC AAC CAA TTC GCC GAC CTG  
ACC TGG GAG GAA TTC CGG ACC AAT CGC CTT GGT GCG GCG CAG AAC TGC TCG GCG  
ACT GCG CAT GGA AAC CAC CGG TTT GTC GAT GGC GTG CTT CCT GTA ACG AGG GAT  
TGG AGG GAG CAA GGG ATA GTG AGC CCT GTA AAG GAC CAA GGA AGC TGT GGA  
TCT TGC TGG ACT TTC AGT ACT ACT GGA GCA CTA GAG GCT GCA TAT ACA CAG CTA  
ACT GGA AAG AGC ACA TCA TTA TCT GAA CAG CAA CTT GTG GAC TGT GCC TCA GCA  
TTC AAT AAC TTT GGA TGC AAT GGA GGT TTG CCT TCC CAA GCC TTT GAA TAC GTT  
AAG TAC AAT GGA GGC ATC GAC ACA GAA CAG ACT TAT CCA TAC CTT GGT GTC AAT  
GGT ATC TGC AAC TTC AAG CAG GAG AAT GTT GGT GTC AAG GTC ATT GAT TCG ATA  
AAC ATC ACC CTG GGT GCT GAG GAT GAG TTG AAG CAT GCA GTG GGC TTG GTG CGT  
CCA GTT AGC GTT GCA TTT GAG GTT GTG AAA GGT TTC AAT CTG TAC AAG AAA GGT  
GTA TAC AGC AGT GAC ACC TGT GGA AGA GAT CCA ATG GAT GTG AAC CAC GCA GTT  
CTT GCC GTC GGT TAT GGA GTC GAG GAC GGG ATT CCT TAT TGG CTC ATC AAG AAC  
TCA TGG GGT ACA AAT TGG GGT GAC AAT GGC TAC TTT AAG ATG GAA CTC GGC AAG  
AAC ATG TGT GGT GTT GCA ACT TGC GCA TCT TAT CCC ATT GTG GCT GTG TAG

*b) VpScVAN* codon optimized for yeast expression

ATG GCT GCT AAA TTG CTT TTC TTC CTT TTG TTT CTG GTG TCT GCA CTA TCG GTC  
GCT TTA GCT GGT TTT GAG GAA GAT AAC CCT ATA AGG AGT GTT ACT CAA AGA CCA  
GAC AGC ATA GAA CCA GCT ATA TTG GGA GTT CTA GGT TCT TGC AGA CAT GCG TTT  
CAC TTC GCC AGA TTT GCT AGA AGA TAT GGT AAA TCG TAT GGT AGT GAA GAA GAG  
ATC AAG AAA CGT TTT GGG ATA TTT GTG GAA AAT TTG GCC TTC ATC AGG TCT ACT  
AAC AGA AAG GAC CTG AGC TAC ACA TTG GGG ATT AAT CAG TTT GCC GAC TTG ACT  
TGG GAG GAA TTT AGA ACC AAT CGT CTA GGT GCA GCA CAA AAT TGC TCT GCG ACT  
GCA CAT GGA AAC CAC AGA TTT GTG GAT GGA GTG TTA CCT GTT ACT AGA GAT TGG  
AGA GAA CAG GGT ATC GTT TCT CCC GTC AAA GAT CAA GGT TCA TGT GGC TCA TGT  
TGG ACG TTC TCT ACA ACA GGA GCC TTA GAA GCT GCC TAT ACC CAA TTG ACA GGG  
AAA TCC ACA AGT CTA AGC GAA CAA CAA CTG GTT GAT TGT GCT TCC GCA TTT AAC  
AAC TTT GGC TGT AAT GGT GGT TTA CCA AGT CAA GCT TTT GAA TAT GTC AAG TAT  
AAT GGA GGT ATT GAT ACA GAA CAA ACG TAT CCG TAT TTA GGC GTA AAC GGC ATT

TGC AAT TTC AAA CAG GAA AAT GTT GGG GTT AAA GTG ATT GAC TCC ATT AAC ATC  
ACG TTG GGT GCA GAG GAC GAG TTA AAA CAT GCT GTG GGT TTA GTT AGG CCT GTT  
TCA GTT GCC TTC GAA GTA GTC AAA GGT TTC AAC CTT TAC AAG AAA GGC GTT TAC  
TCT TCC GAC ACT TGT GGA AGA GAT CCA ATG GAT GTT AAT CAT GCA GTC TTG GCA  
GTA GGT TAC GGT GTA GAA GAT GGC ATT CCC TAT TGG CTT ATT AAG AAT TCA TGG  
GGT ACC AAT TGG GGC GAT AAC GGT TAC TTC AAG ATG GAG TTA GGA AAG AAT ATG  
TGC GGA GTA GCT ACC TGT GCC TCA TAC CCA ATT GTA GCG GTC TAA

c) *VpHvVAN* codon optimized for barley expression

ATG GCA GCT AAG CTC CTC TTC TTC CTG CTG TTT CTA GTG TCC GCC TTG TCC GTA  
GCG CTT GCT GGT TTC GAG GAG GAC AAC CCG ATT CGG TCG GTT ACC CAG AGG CCG  
GAT AGC ATT GAG CCT GCC ATC CTC GGT GTT CTA GGG TCA TGT CGG CAT GCC TTT  
CAC TTC GCT CGC TTT GCT CGC CGT TAT GGG AAG AGC TAT GGC TCC GAG GAA GAG  
ATC AAG AAG CGC TTC GGT ATC TTC GTA GAG AAC CTC GCC TTC ATT CGC TCG ACC  
AAT AGG AAG GAC CTT TCC TAC ACT CTC GGC ATC AAT CAG TTT GCC GAC CTC ACT  
TGG GAA GAG TTC AGG ACG AAC CGC TTG GGA GCC GCA CAA AAC TGC AGC GCT  
ACA GCG CAT GGC AAC CAC CGG TTC GTG GAT GGA GTT CTG CCT GTG ACA CGT GAT  
TGG AGA GAG CAA GGC ATC GTG TCT CCG GTT AAG GAT CAG GGA TCT TGC GGG TCT  
TGC TGG ACC TTT AGC ACG ACT GGG GCT CTG GAA GCC GCG TAC ACC CAA CTC ACA  
GGT AAA TCC ACG AGT CTC AGC GAA CAG CAA CTC GTC GAC TGT GCC AGT GCG TTC  
AAC AAT TTC GGC TGC AAT GGT GGG CTG CCA AGT CAG GCG TTC GAG TAC GTC AAG  
TAC AAT GGT GGA ATA GAC ACC GAA CAG ACC TAC CCC TAT CTC GGC GTC AAT GGC  
ATC TGC AAC TTC AAA CAG GAG AAC GTG GGC GTC AAG GTC ATA GAC TCC ATC AAC  
ATA ACG CTC GGA GCC GAG GAT GAG CTG AAG CAC GCA GTG GGC TTG GTC AGA  
CCA GTG TCA GTT GCA TTC GAG GTC GTG AAG GGC TTT AAC CTC TAC AAG AAA GGG  
GTG TAC TCG AGC GAT ACC TGT GGC AGG GAC CCA ATG GAC GTC AAT CAC GCG GTC  
CTT GCA GTG GGT TAT GGC GTC GAG GAT GGC ATC CCC TAC TGG CTG ATC AAG AAC  
TCT TGG GGC ACC AAC TGG GGT GAC AAC GGG TAC TTC AAG ATG GAG CTT GGC AAG  
AAC ATG TGC GGA GTA GCC ACA TGC GCG TCA TAC CCC ATT GTG GCT GTT TGA

d) *Nicotiana benthamiana*, cysteine proteinase

ATG TCT CGT TTC TCA CTC CTA TTG GCT CTC GTC GTC GCC GGT GGC CTT TTC GCC  
TCC GCA CTC GCC GGA CCG GCG ACC TTT GCC GAT GAG AAT CCG ATC AGA CAA GTC  
GTT TCT GAC GGT TTA CAT GAG CTG GAG AAC GCA ATT CTC CAA GTC GTC GGC AAG  
ACC CGC CAT GCT CTC TCC TTC GCT CGC TTT GCT CAC AGG TAT GGG AAG AGG TAC  
GAG TCA GTT GAG GAG ATA AAG CAA AGG TTC GAG GTA TTT TTG GAC AAT TTG AAG  
ATG ATT CGA TCG CAC AAC AAG AAA GGA CTA TCA TAC AAA CTC GGT GTC AAT GAG  
TTT ACC GAC CTA ACA TGG GAC GAG TTC CGG AGA GAC AGG TTG GGG GCA GCT CAA

AAC TGT TCA GCC ACC ACA AAG GGC AAT CTC AAA GTC ACT AAC GTT GTT CTG CCG  
GAG ACG AAA GAC TGG CGG GAA GCT GGG ATT GTC AGC CCA GTC AAG AAC CAG  
GGC AAG TGC GGA TCT TGC TGG ACA TTC AGC ACT ACT GGT GCA CTA GAA GCA GCA  
TAT AGC CAA GCA TTT GGG AAG GGA ATC TCT CTA TCT GAG CAG CAG CTT GTG GAC  
TGT GCT GGA GCT TTT AAT AAC TTT GGC TGC AAT GGT GGG CTC CCA TCA CAA GCC  
TTT GAG TAT ATT AAA TCC AAT GGT GGT CTT GAC ACT GAA GAA GCA TAT CCA TAC  
ACT GGC AAG AAT GGC TTA TGT AAA TTC TCA TCA GAA AAT GTT GGT GTC AAA GTC  
ATC GAT TCC GTC AAT ATT ACC CTG GGT GCT GAA GAT GAA CTA AAA TAC GCG GTT  
GCA TTG GTT AGG CCC GTT AGT ATA GCT TTT GAG GTG ATA AAA GGT TTC AAA CAA  
TAC AAG AGT GGT GTT TAC ACC AGC ACC GAA TGC GGC AAC ACT CCC ATG GAT GTA  
AAC CAT GCT GTT CTT GCT GTG GGT TAC GGT GTT GAA AAT GGT GTT CCC TAT TGG  
CTC ATC AAG AAT TCA TGG GGA GCA GAT TGG G

*e) v<sub>pn</sub>bΔspΔ137<sub>van</sub>*

ATG TCT CGT TTC TCA CTC CTA TTG GCT CTC GTC GTC GCC GGT GGC CTT TTC GCC  
TCC GCA CTC GGT TTC GAA GAA GAC AAT CCA ATC CGG TCC GTT ACA CAA AGG CCT  
GAC TCG ATT GAG CCT GCC ATC CTC GGC GTC CTT GGC AGT TGC CGC CAC GCC TTC  
CAC TTC GCA CGG TTC GCC CGC AGG TAC GGG AAG AGC TAC GGA TCG GAG GAG  
GAG ATC AAG AAG AGG TTC GGG ATC TTC GTG GAG AAT CTA GCG TTT ATC CGG TCC  
ACT AAT CGG AAG GAT CTG TCG TAT ACC CTA GGA ATC AAC CAA TTC GCC GAC CTG  
ACC TGG GAG GAA TTC CGG ACC AAT CGC CTT GGT GCG GCG CAG AAC TGC TCG GCG  
ACT GCG CAT GGA AAC CAC CGG TTT GTC AAC GTT GTT CTG CCG GAG ACG AGG GAT  
TGG AGG GAG CAA GGG ATA GTG AGC CCT GTA AAG GAC CAA GGA AGC TGT GGA  
TCT TGC TGG ACT TTC AGT ACT ACT GGA GCA CTA GAG GCT GCA TAT ACA CAG CTA  
ACT GGA AAG AGC ACA TCA TTA TCT GAA CAG CAA CTT GTG GAC TGT GCC TCA GCA  
TTC AAT AAC TTT GGA TGC AAT GGA GGT TTG CCT TCC CAA GCC TTT GAA TAC GTT  
AAG TAC AAT GGA GGC ATC GAC ACA GAA CAG ACT TAT CCA TAC CTT GGT GTC AAT  
GGT ATC TGC AAC TTC AAG CAG GAG AAT GTT GGT GTC AAG GTC ATT GAT TCG ATA  
AAC ATC ACC CTG GGT GCT GAG GAT GAG TTG AAG CAT GCA GTG GGC TTG GTG CGT  
CCA GTT AGC GTT GCA TTT GAG GTT GTG AAA GGT TTC AAT CTG TAC AAG AAA GGT  
GTA TAC AGC AGT GAC ACC TGT GGA AGA GAT CCA ATG GAT GTG AAC CAC GCA GTT  
CTT GCC GTC GGT TAT GGA GTC GAG GAC GGG ATT CCT TAT TGG CTC ATC AAG AAC  
TCA TGG GGT ACA AAT TGG GGT GAC AAT GGC TAC TTT AAG ATG GAA CTC GGC AAG  
AAC ATG TGT GGT GTT GCA ACT TGC GCA TCT TAT CCC ATT GTG GCT GTG TAG

*f) GhVAN*

ATG GCT CGC CTT CTG CTG CTC CTC GTC GGA GTT CTG ATC GCC TGC GCC GCC GGC  
GCA AGA GCC GGA TCG GAG TTC CTC GCC GAG GAT AAT CCG ATC AGG CAA GTC GTC  
GAC GGT ATG CAC GAA CTC GAG TCG TCT ATT CTC AAA GCA GTC GGC AAC TCG CGC  
CGC GCC TTC TCC TTC GCT CGC TTT GCT CAT AGA TAC GGG AAG AGC TAC GAG AGT  
TCG GAG GAG ATA CAG AAG AGG TTC CAA GTT TAC TCT GAG AAT TTG AGG ATG ATC  
CGA TCG CAT AAC AAG AAA GGA CTA TCC TAT TCC ATG GGC GTT AAC GAG TTC TCT  
GAT CTG ACA TGG GAC GAG TTC AAA AAG CAT AGA TTG GGA GCT GCT CAA AAT TGC  
TCC GCT ACA AGA AGG GGC AAT CAT AAG CTC ACC AGT GCT ATC CTT CCG GAC TCG  
AAA GAC TGG AGG GAA AGT GGC ATT GTT AGC CCA GTG AAA AGT CAA GGT AGC  
TGT GGA TCT TGC TGG ACA TTC AGT TCA ACT GGA GCA CTG GAG GCA GCT TAT GCA  
CAA GCA TTC GGA AAG GGT ATT TCT CTG TCT GAG CAG CAG CTC GTT GAT TGT GCT  
GGA GCT TTC AAC AAC TTT GGC TGC AAT GGT GGA TTG CCC TCT CAA GCC TTC GAA  
TAC ATC AAA TAT AAC GGT GGT CTT ATG ACT GAG GAG GCA TAT CCA TAT ACT GGT  
CAT GAT GGA GAA TGC AAG TAT TCC TCT GAA AAT GCT GCC GTC CAA GTA CTT GAC  
TCT GTC AAT ATC ACC CTG GGT GCT GAA GAT GAA CTT AAG CAC GCA GTT GCA TTG  
GTT CGG CCA GTA AGT GTG GCA TTT GAG GTT GTT GAT GGA TTC CGA TCA TAC AAT  
GGT GGA GTT TAC ACT AGC ACT ACT TGT GGC AGC GAT CCA ATG GAT GTA AAC CAT  
GCT GTT CTT GCT GTT GGT TAC GGA GTT GAA GGT GGC GTG CCG TAC TGG CTA ATC  
AAG AAT TCA TGG GGA GCT GAC TGG GGG GAC CAA GGC TAC TTC AAA ATG GAG  
ATG GGC AAG AAC ATG TGT GGT GTT GCA ACA TGT GCA TCA TAC CCT GTA GTT GCT  
TAA

g) VpVAN amino acid sequence

```

      20          40          60          80
MAAKLLFLLFLVSALSVALAGFEEDNPIRSVTQRPDSIEPAILGVLGSCRHAFHFARFARRYGKSYGSEEEIIKKRFGIFVE
      100        120        140
  NLAFIRSTNNRKDLSYTLGINQFADLTWEEFRTNRLGAAQNCSATAHGNHRFVDGVLPVTRDWREQGIVSPVKDQGSC
  160  *      180          200          220
  GSCWTFFSTTGALEAAYQLTGKSTSLSEQQLVDASAFNNFGNGGLPSQAFEVVKYNGGIDTEQTYPYLGVNGICNFK
  240          260          280          300
  QENVGVKVIDSINITLGAEDELKHAVGLVRPVSVAFEVVKGFNLYKKGVYSSDTCGRDPMDVNHAVLAVGYGVEDGIPY
  320          340
  WLIKNSWGTNWGDNGYFKMELGKNMGVATCASYPIAV
  
```

▼: Putative protease cleavage site

\*: Amino acid residues involved in stabilizing the oxyanion hole

Amino acid residues in bold: A putative ER-targeting signal peptide

Amino acid residues in blue: Conserved residues known to contribute to the formation of the active site in cysteine proteinases

Amino acids with wavy underline: GCxGG domain found in papaine-like cysteine proteinases

Amino acid residues in gray: Conserved cysteins involved in disulfide bridge formation in cysteine proteinases

Underlined amino acid residues: ERFNIN motif

Boxed amino acids: Putative sumoylation site

### Supplementary Figure 3: Enzyme activity of *VpUGT72U1* and *AtUGT72E2* with ferulic acid

Yeast strains integrated with *VpUGT72U1* and *AtUGT72E2* were grown on synthetic complete (SC) medium supplemented with 2.5mM of ferulic acid and after 72h cells were harvested for LC-metabolic profiling.

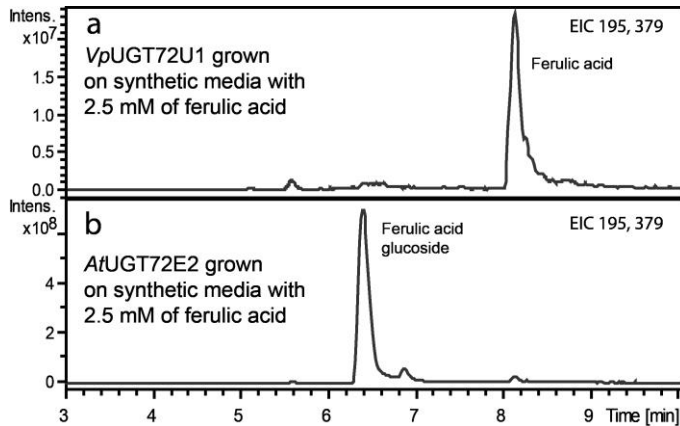

(a) *VpUGT72U1* stably integrated yeast was grown on SC medium supplemented with 2.5mM of ferulic acid EIC 195: Extracted ion chromatogram m/z (ferulic acid mw + H<sup>+</sup>) and EIC 379: Extracted ion chromatogram m/z (ferulic acid glucoside mw + Na<sup>+</sup>)

(b) *AtUGT72E2* stably integrated yeast were grown on synthetic media with 2.5mM of ferulic acid. EIC 195: Extracted ion chromatogram m/z (ferulic acid mw + H<sup>+</sup>) and EIC 379: Extracted ion chromatogram m/z (ferulic acid glucoside mw + Na<sup>+</sup>)

*VpUGT72U1* is not able to glycosylate ferulic acid (a) while *AtUGT72E2* is very efficiently glycosylate ferulic acid to ferulic acid glucoside (b).

**Supplementary Figure 4: Substrate specificities of *VpScVAN* and *vpScΔspvan* were assayed in *S. cerevisiae*.**

Yeast harbouring stably integrated *VpVAN*, *VpScVAN* codon optimized for yeast expression, truncated *VpVAN* devoid of the signal peptide (*vp Δsp van*) or truncated *VpScVAN* codon optimized and devoid of the signal peptide (*vpScΔsp van*) were tested in combination with a stably integrated *AtUGT72E2*. The strains were incubated with ferulic acid for 72 h in synthetic complete medium before metabolite profiles were determined by LC-MS.

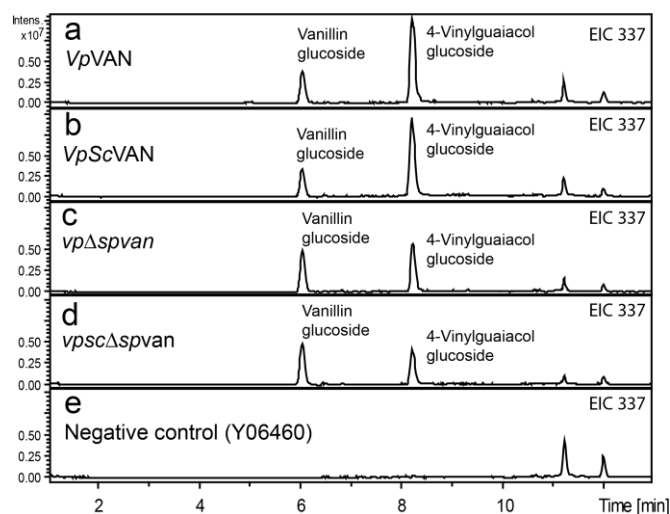

Formation of vanillin glucoside was observed with yeast fed with ferulic acid (RT 6 min) in all strains except the negative control where no vanillin or vanillin glucoside observed. Administering yeast with ferulic acid resulted in production of aroma compound 4-vinylguaiacol glucoside in high concentrations due to yeast ferulate decarboxylase activity (RT 8.2 m). EIC 337: m/z Vanillin glucoside (M + Na<sup>+</sup>)



**Supplementary Figure 5: The biological activity of vanillin synthase was also assessed by a stable expression in barley**

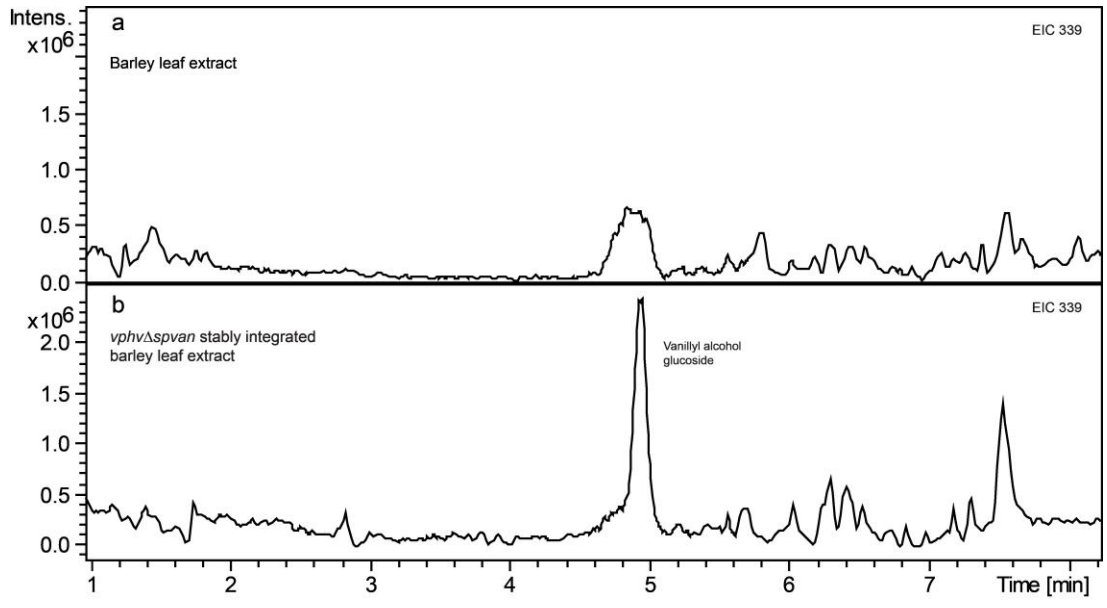

*VpHvVAN* gene sequence was modified to encode a D-hordein signal peptide as a replacement for the original vanilla ER-targeting signal peptide (*vphvΔspvan*). A constitutive ubiquitin promoter was used to drive the expression of both genes. Leaf samples from successfully transformed plants were collected 6-8 weeks after transfer of plantlets to the greenhouse and metabolic profiling was carried out by LC-MS. Barley plants transformed with *vphvΔspvan* were found to accumulate vanillyl alcohol glucoside in higher levels than control plants (b) EIC 339: m/z vanillyl alcohol glucoside (M + Na<sup>+</sup>)

**Supplementary Table 1: Plasmids constructed in this study**

| Plasmid | Backbone     | Gene content                                                                                 | Plasmid type                                | Selection marker |
|---------|--------------|----------------------------------------------------------------------------------------------|---------------------------------------------|------------------|
| pNG1    | p426-GPD     | <i>VpVAN</i> from <i>V. planifolia</i> made with PCR from cDNA lib with SpeI and BamHI sites | 2 micron ( <i>S. cerevisiae</i> )           | URA3             |
| PNG4    | pBS II SK(+) | <i>VpScVAN</i> synthetically made from MWG for yeast expression XbaI and BamHI               |                                             |                  |
| pNG5    | p426-GPD     | <i>OMT1</i> <i>V. planifolia</i> made with PCR from cDNA lib                                 | 2 micron ( <i>S. cerevisiae</i> )           | URA3             |
| pNG6    | p426-GPD     | <i>OMT1a</i> <i>V. planifolia</i> made with PCR from cDNA lib                                | 2 micron ( <i>S. cerevisiae</i> )           | URA3             |
| pNG7    | p426-GPD     | <i>OMT3</i> <i>V. planifolia</i> made with PCR from cDNA lib                                 | 2 micron ( <i>S. cerevisiae</i> )           | URA3             |
| pNG8    | p426-GPD     | <i>OMT3a</i> <i>V. planifolia</i> made with PCR from cDNA lib                                | 2 micron ( <i>S. cerevisiae</i> )           | URA3             |
| pNG9    | p426-GPD     | <i>OMT3b</i> <i>V. planifolia</i> made with PCR from cDNA lib                                | 2 micron ( <i>S. cerevisiae</i> )           | URA3             |
| pNG10   | p426-GPD     | <i>OMT3c</i> <i>V. planifolia</i> made with PCR from cDNA lib                                | 2 micron ( <i>S. cerevisiae</i> )           | URA3             |
| pNG11   | p426-GPD     | <i>OMT4</i> <i>V. planifolia</i> made with PCR from cDNA lib                                 | 2 micron ( <i>S. cerevisiae</i> )           | URA3             |
| pNG12   | p426-GPD     | <i>OMT5a</i> <i>V. planifolia</i> made with PCR from cDNA lib                                | 2 micron ( <i>S. cerevisiae</i> )           | URA3             |
| pNG13   | p426-GPD     | <i>OMT5b</i> <i>V. planifolia</i> made with PCR from cDNA lib                                | 2 micron ( <i>S. cerevisiae</i> )           | URA3             |
| pNG14   | p426-GPD     | <i>OMT5c</i> <i>V. planifolia</i> made with PCR from cDNA lib                                | 2 micron ( <i>S. cerevisiae</i> )           | URA3             |
| pNG15   | P416TEF      | <i>OMT5c</i> <i>V. planifolia</i> made with PCR from cDNA lib                                | <i>CEN-ARS</i> ( <i>S. cerevisiae</i> )URA3 | URA3             |
| pNG16   | P416TEF      | <i>OMT1</i> <i>V. planifolia</i> made with PCR from cDNA lib                                 | <i>CEN-ARS</i> ( <i>S. cerevisiae</i> )     | URA3             |
| pNG17   | P416TEF      | <i>OMT1a</i> <i>V. planifolia</i> made with PCR from                                         | <i>CEN-ARS</i> ( <i>S.</i>                  | URA3             |

|       |                | cDNA lib                                                                  | <i>cerevisiae</i>                    |                |
|-------|----------------|---------------------------------------------------------------------------|--------------------------------------|----------------|
| pNG18 | P416TEF        | <i>OMT3 V. planifolia</i> made with PCR from cDNA lib                     | <i>CEN-ARS (S. cerevisiae)</i>       | URA3           |
| pNG19 | P416TEF        | <i>OMT3a V. planifolia</i> made with PCR from cDNA lib                    | <i>CEN-ARS (S. cerevisiae)</i>       | URA3           |
| pNG20 | P416TEF        | <i>OMT3b V. planifolia</i> made with PCR from cDNA lib                    | <i>CEN-ARS (S. cerevisiae)</i>       | URA3           |
| pNG21 | P416TEF        | <i>OMT3c V. planifolia</i> made with PCR from cDNA lib                    | <i>CEN-ARS (S. cerevisiae)</i>       | URA3           |
| pNG22 | P416TEF        | <i>OMT4 V. planifolia</i> made with PCR from cDNA lib                     | <i>CEN-ARS (S. cerevisiae)</i>       | URA3           |
| pNG23 | P416TEF        | <i>OMT5a V. planifolia</i> made with PCR from cDNA lib                    | <i>CEN-ARS (S. cerevisiae)</i>       | URA3           |
| pNG24 | P416TEF        | <i>OMT5b V. planifolia</i> made with PCR from cDNA lib                    | <i>CEN-ARS (S. cerevisiae)</i>       | URA3           |
| pNG25 | P416TEF        | <i>OMT5c V. planifolia</i> made with PCR from cDNA lib                    | <i>CEN-ARS (S. cerevisiae)</i>       | URA3           |
| pNG26 | topo blunt end | <i>CYP98A3</i> cloned from <i>V. planifolia</i> cDNA lib                  |                                      |                |
| pNG27 | PYES2-Des52    | <i>VpVAN</i> with his tag gateway cloning from cDNA to des vector         | Plant gateway vector                 | Kan, carb, Rif |
| pNG28 | pVAN714        | pTEF1- <i>VpVAN</i> + pPGK1- <i>AtUGT72E2</i>                             | Integration ( <i>S. cerevisiae</i> ) | URA3           |
| pNG29 | pVAN714        | pTEF1- <i>VpScVAN</i> codon opt. + pPGK1- <i>AtUGT72E2</i>                | Integration ( <i>S. cerevisiae</i> ) | URA3           |
| pNG30 | pVAN714        | pTEF1- <i>VpVAN</i> codon opt.                                            | Integration ( <i>S. cerevisiae</i> ) | URA3           |
| pNG31 | pVAN714        | pTEF1- <i>VpVAN</i> + pPGK1- <i>VpUGT72U1</i>                             | Integration ( <i>S. cerevisiae</i> ) | URA3           |
| pNG32 | pVAN714        | pTEF1- <i>vpΔsp van</i> + pPGK1- <i>AtUGT72E2</i>                         | Integration ( <i>S. cerevisiae</i> ) | URA3           |
| pNG33 | pVAN714        | pTEF1- <i>vp<sub>sc</sub> Δsp<sub>van</sub></i> + pPGK1- <i>AtUGT72E2</i> | Integration ( <i>S. cerevisiae</i> ) | URA3           |

---

|       |                             |                                                                   |                                      |                |
|-------|-----------------------------|-------------------------------------------------------------------|--------------------------------------|----------------|
| pNG34 | pEAQ-HT-DEST3               | <i>VpVAN</i> cloning from cDNA to des vector                      | Plant gateway destination vector     | Kan            |
| pNG27 | PYES2-Des52                 | <i>VpVAN</i> with his tag gateway cloning from cDNA to des vector | Plant gateway vector                 | Kan, carb, Rif |
| pNG35 | pEAQ-HT-DEST3               | <i>vp Δ61 van</i>                                                 | Plant gateway destination vector     | Kan            |
| PNG36 | pEAQ-HT-DEST3               | <i>vp Δ137 van</i>                                                | Plant gateway destination vector     | Kan            |
| pNG37 | pEAQ-HT-DEST3               | <i>vp nb Asp Δ137 van</i>                                         | Plant gateway destination vector     | Kan            |
| pNG38 | pEAQ-HT-DEST3               | <i>GhVAN</i>                                                      | Plant gateway destination vector     | Kan            |
| pNG39 | pWBVec8-UbiUSERNOS          | <i>VpHvVAN</i> codon optimized for barley expression              | Barley stable gene expression vector | spectinomyci   |
| pNG40 | pWBVec8-Ubi::HorDSP-USERNOS | <i>vp hvAsp van</i> codon optimized for barley expression         | Barley stable gene expression vector | spectinomyci   |

---

**Supplementary Table 2: Yeast strains constructed in this study**

| Species                         | strain name                                                      | Relevant genotype                                                                                              |
|---------------------------------|------------------------------------------------------------------|----------------------------------------------------------------------------------------------------------------|
| <i>Saccharomyces cerevisiae</i> | Y06460:: <i>VpVAN</i> ::<br><i>AtUGT72E2</i>                     | MATa his3-D1 leu2-D0 met 15-d0 ura3-D0<br>YMR318C ( <i>adh6</i> ::KanMX4 ( <i>exg1</i> -<br>d0)::(pNG28)::URA3 |
| <i>Saccharomyces cerevisiae</i> | Y06460:: <i>VpScVAN</i><br>codon opt::<br><i>AtUGT72E2</i>       | MATa his3-D1 leu2-D0 met 15-d0 ura3-D0<br>YMR318C ( <i>adh6</i> ::KanMX4 ( <i>exg1</i> -<br>d0)::(pNG29)::URA3 |
| <i>Saccharomyces cerevisiae</i> | Y06460:: <i>VpScVAN</i>                                          | MATa his3-D1 leu2-D0 met 15-d0 ura3-D0<br>YMR318C ( <i>adh6</i> ::KanMX4 ( <i>exg1</i> -<br>d0)::(pNG31)::URA3 |
| <i>Saccharomyces cerevisiae</i> | Y06460:: <i>VpScVAN</i><br>codon opt::<br><i>VpUGT72U1</i>       | MATa his3-D1 leu2-D0 met 15-d0 ura3-D0<br>YMR318C ( <i>adh6</i> ::KanMX4 ( <i>exg1</i> -<br>d0)::(pNG30)::URA3 |
| <i>Saccharomyces cerevisiae</i> | Y06460:: <i>VpΔSP</i><br><i>VAN</i> :: <i>AtUGT72E2</i>          | MATa his3-D1 leu2-D0 met 15-d0 ura3-D0<br>YMR318C ( <i>adh6</i> ::KanMX4 ( <i>exg1</i> -<br>d0)::(pNG32)::URA3 |
| <i>Saccharomyces cerevisiae</i> | Y06460::<br><i>VpScΔSPVAN</i> codon<br>opt::<br><i>AtUGT72E2</i> | MATa his3-D1 leu2-D0 met 15-d0 ura3-D0<br>YMR318C ( <i>adh6</i> ::KanMX4 ( <i>exg1</i> -<br>d0)::(pNG33)::URA3 |

**Supplementary Table 3: Primers used in this study**

| Candidate genes               | Oligo nucleotide used for cloning                                                    |
|-------------------------------|--------------------------------------------------------------------------------------|
| pYes2 Forward                 | ATG CAA AAA CTG CAT AAC C                                                            |
| pYes2 Reverse                 | TAG ATG CAT GCT CGA GCG G                                                            |
| <i>Vp</i> VAN Forward         | ATT TAC TAG TAA AAT GGC AGC TAA GCT C                                                |
| <i>Vp</i> VAN Reverse         | ATT TAG GAT CCC TAC ACA GCC ACA ATG                                                  |
| <i>In situ Vp</i> VAN Forward | AAG CCT TTG AAT ACG TTA AGT ACA ATG GA                                               |
| <i>In situ Vp</i> VAN Reverse | GTG TCA CTG CTG TAT ACA CCT TTC TT                                                   |
| TNT <i>Vp</i> VAN Forward     | GAT CCT AAT ACG ACT CAC TAT AGG GAA CAG CCA CCA TGG CAG<br>CTA AGC TCC TCT T         |
| TNT <i>Vp</i> VAN Reverse     | TTT TTT TTT TTT TTT TTT TTT TTT ACT ACA CAG CCA CAA TGG GAT<br>AAG ATG CGC AAG TTG C |
| <i>Vp</i> VAN gateway Forward | GGG GAC AAG TTT GTA CAA AAA AGC AGG CTA AAA ATG TCT ATG<br>GCA GCT AAG CTC CTC TTC   |
| <i>Vp</i> VAN gateway Reverse | GGG GAC CCA GCT TTC TTG TAC AAA GTG GTC ACA GCC ACA ATG<br>GGA TAA GAT G             |
| <i>VpHv</i> VAN forward       | GGTCTTAAUATGGCAGCTAAGCTCCTC                                                          |
| <i>VpHv</i> VAN reverse       | GGCATTAAU TCAAACAGCCACAATGGGGTATG                                                    |
| <i>VpHv</i> ΔSPVAN forward    | GGTCTTAAUATGTTCTGCTGTTTCTAGTGTCGG                                                    |

|                                   |                                                                                                       |
|-----------------------------------|-------------------------------------------------------------------------------------------------------|
| TNT <i>Vp</i> Δ61VAN forward      | GGATCCTAATACGACTCACTATAGGGAACAGCCACC ATG<br>AGATATGGTAAATCGTATGGTAGTG                                 |
| TNT <i>Vp</i> Δ61VAN reverse      | TTTTTTTTTTTTTTTTTTTTTTTTTTTTTTTTTTTTTTAGACCGCTACAATTGGG<br>TATG                                       |
| <i>Vp</i> Δ61VAN gateway forward  | GGG GAC AAG TTT GTA CAA AAA AGC AGG CTT CAA AA ATG TCTT<br>CGA TGA GGT ACG GGA AGA GCT ACG GAT CGG AG |
| <i>Vp</i> Δ61VAN gateway reverse  | GGG GAC CAC TTT GTA CAA GAA AGC TGG GT<br>CTACACAGCCACAATGGGATAAG                                     |
| TNT <i>Vp</i> Δ137VAN forward     | GGATCCTAATACGACTCACTATAGGGAACAGCCACC ATG<br>TTACCTGTTACTAGAGATTGGAG                                   |
| TNT <i>Vp</i> Δ137VAN reverse     | TTTTTTTTTTTTTTTTTTTTTTTTTTTTTTTTTTTTTTAGACCGCTACAATTGGG<br>TATG                                       |
| <i>Vp</i> Δ137VAN gateway forward | GGGG ACA AGT TTG TAC AAA AAA GCA GGC TTC AAAA ATG TCT<br>TCG ATG GCG TGC TTC CTG TAA CGA GGG A        |
| <i>Vp</i> Δ137VAN gateway reverse | GGG GAC CAC TTT GTA CAA GAA AGC TGG GT<br>CTACACAGCCACAATGGGATAAG                                     |
| <i>Gh</i> VAN gateway forward     | GGG GAC AAGT TTG TAC AAA AAA GCA GGC T TC AAAA<br>ATGGCTCGCCTTCTGCTGCTC                               |
| <i>Gh</i> VAN gateway reverse     | GGG GAC CAC TTT GTA CAA GAA AGC TGG GT<br>TTAAGCAACTACAGGGTATGATG                                     |
| <i>Vp</i> UGT72U1 Forward         | ATCAACGGGUAAAATGGAGAGCAATCCCAACCG                                                                     |
| <i>Vp</i> UGT72U1 Reverse         | CGTGCGAUTCACTTGCCACTGAGAACCG                                                                          |
